# Supplementary material for: Association and diagnostic value of serum SPINK4 in colorectal cancer
Source: PeerJ. 2019 Apr 4;7:e6679. doi: 10.7717/peerj.6679 (PMC6451835; doi:10.7717/peerj.6679)
Supplement: Data S1 — The serum level of SPINK4 in 70 preoperative CRC patients, 30 postoperative CRC patients, 30 gastric cancer patients, and 30 healthy controls [file peerj-07-6679-s001.xlsx]

## Sheet: spink4 expression
expression of SPINK4 in groups
normal control	colon_be	gastric cacner	colon_af
1.826	9.187	0.269	9.992
2.645	9.143	3.406	2.644
1.756	5.815	7.3	2.55
1.175	4.422	3.057	2.885
1.602	4.092	4.155	2.42
2.01	2.562	3.336	2.923
1.901	3.945	2.235	2.613
1.751	3.553	6.509	5.571
0.883	12.656	2.661	2.681
2.026	0.86	5.012	5.549
1.826	10.994	1.132	2.869
2.645	10.964	1.214	2.597
1.756	3.574	5.387	5.43
1.175	6.159	4.176	2.404
1.602	8.426	2.986	2.383
2.01	2.9	0.614	2.394
1.901	2.88	3.053	2.809
1.751	3.656	1.571	2.793
0.883	2.274	0.891	2.368
2.026	2.621	2.47	2.751
1.826	5.173	5.461	1.649
2.645	2.241	1.859	3.326
1.756	6.09	3.053	2.544
1.175	2.635	1.571	2.03
1.602	5.484	0.891	2.613
2.01	3.683		3.265
1.901	1.488		3.109
1.751	8.548		2.907
0.883	3.876		6.076
2.026	3.026		2.628
	4.26
	3.485
	1.834
	9.807
	2.105
	2.556
	1.917
	13.976
	10.964
	3.574
	4.479
	3.574
	6.159
	8.426
	2.9
	2.88
	3.656
	2.274
	2.621
	5.173
	2.241
	6.09
	2.635
	5.484
	3.683
	1.488
	8.548
	3.876
	3.026
	4.26
	3.485
	1.834
	9.807
	2.105
	2.556
	1.917
	13.976
	1.834
	9.807
	5.484

## Sheet: patient data
ID	gender	age	CEA	CA125	CA153	CA199	numLN	KRAS mutation	location	T_stage	N_stage	M_stage	grade	spink4	DFS	status	OS
62181	male	66	457.87	20	22	1245	2	no	colon	T3	N1	M0	M	1.488	114	0	113
80950	male	60	123.4	17	30	25	2	no	colon	T3	N1	M1	L	9.187	86	0	83
85536	female	62	14.74	21	19	19	2	yes	colon	T3	N1	M1	M	3.574	33	0	77
90165	female	40	11.21	30	22	24	4	no	rectal	T4	N1	M1	M	4.092	117	0	70
90258	male	80	1.39	22	20	11	2	no	colon	T4	N1	M0	M	4.26	47	0	59
106239	male	61	1745	567.3	20	1299	1	no	colon	T3	N1	M1	M	3.485	58	1	54
112716	male	34	1744	166.5	7.8	130.9	6	no	colon	T3	N1	M1	M	3.574	48	0	39
113941	male	65	2.02	30	31	36	2	no	colon	T4	N1	M1	M	2.241	46	1	33
114345	male	72	26.71	40.56	23	415.3	4	no	colon	T4	N1	M1	L	1.917	54	1	2
114994	female	66	1.64	19	15	20	3	no	colon	T4	N1	M0	L	3.683	47	0	44
115377	female	56	1.47	23	25	35	3	no	colon	T4	N1	M0	M	3.876	55	0	30
116302	male	70	0.52	29	19	16	3	no	colon	T4	N1	M0	L	1.917	56	0	41
116332	male	71	55.15	12	20	119.7	2	no	colon	T3	N1	M1	M	6.159	44	1	17
116340	female	71	1.79	21	10	21	4	no	colon	T4	N1	M0	L	1.488	44	0	42
116550	male	79	57.41	111.7	21	82.62	4	no	colon	T3	N1	M1	M	8.426	43	1	12
117195	female	64	12.04	17	10	709.7	4	no	colon	T4	N1	M0	L	1.834	55	1	29
117522	male	68	5.69	23	12	30	2	no	colon	T4	N1	M0	M	3.026	47	0	42
117613	female	72	1658	302.7	12	22	4	no	colon	T3	N1	M1	M	2.635	42	1	28
117698	male	75	2.82	59.54	20	13	4	no	colon	T4	N1	M1	M	13.976	54	0	28
118367	male	61	1.14	22	18	15	3	no	colon	T4	N1	M0	M	3.485	47	0	42
119762	male	56	3.08	12	20	11	2	no	colon	T4	N1	M0	L	1.834	43	0	41
120054	male	63	4.2	33	20	15	2	no	colon	T4	N1	M0	M	2.105	40	0	39
120228	male	54	18	14	19	582.5	3	yes	colon	T4	N1	M1	L	9.807	44	1	19
120231	male	33	1.51	22	25	34	4	no	colon	T4	N1	M0	L	8.548	41	0	35
120484	female	38	58.43	216.4	20	21	4	no	colon	T3	N1	M1	M	5.484	40	1	20
121319	male	63	1589	75.7	27	259.2	3	no	rectal	T4	N1	M1	M	3.574	55	0	39
121469	male	61	0.86	16	12	26	3	no	colon	T3	N1	M1	M	6.09	40	0	38
122430	male	58	1.88	28	15	19	2	no	colon	T3	N1	M1	M	8.426	54	0	38
130096	male	46	13.55	34	26	35	2	no	rectal	T4	N1	M1	M	4.422	29	0	30
130896	male	55	7.72	13	18	18	2	yes	colon	T3	N1	M1	M	12.656	31	0	28
133705	female	55	2.89	31	31	30	1	no	rectal	T3	N1	M0	M	3.656	31	0	26
138430	male	62	8.52	31	20	25	1	no	rectal	T3	N1	M0	M	2.88	24	0	21
140487	male	77	9.42	30	24	272.9	4	no	colon	T3	N1	M1	M	10.964	32	0	19
144741	male	56	10.8	33	15	31	1	no	colon	T2	N1	M1	M	5.76	33	1	24
142348	female	43	2.61	35	26	15	2	no	colon	T3	N1	M1	M	2.621	21	0	17
145100	male	34	3.77	16	13	80.4	1	no	colon	T3	N1	M1	L	2.9	58	0	11
145413	female	60	2.38	19	13	14	2	no	colon	T3	N1	M1	M	6.159	29	0	14
146520	male	55	1.99	19	25	28	2	no	rectal	T4	N1	M1	M	2.556	22	0	13
147353	female	51	16.1	11	10	20	4	no	rectal	T4	N1	M1	M	5.815	12	0	11
148058	female	55	113.93	21	29	36	3	no	colon	T4	N1	M1	M	0.86	11	0	11
148475	female	49	368.45	29	19	240.1	2	no	rectal	T4	N1	M1	H	4.479	20	0	9
148925	female	66	198.72	30	17	23	1	no	colon	T3	N1	M1	M	2.274	10	0	8
150532	male	61	88.55	417.7	114.9	1255	1	no	colon	T3	N1	M1	L	9.807	8	0	8
150715	male	68	1.97	29	21	19	2	yes	colon	T3	N1	M1	M	3.656	9	0	7
152077	female	44	124.48	35	30	1357	3	no	rectal	T4	N1	M1	L	2.9	118	0	6
153519	female	47	10.64	23	10	30	1	no	colon	T3	N1	M1	M	2.88	11	0	6
154218	female	58	4.23	12	21	19	1	no	colon	T3	N1	M1	M	10.994	5	0	4
154360	male	65	28.28	13	31	26	1	no	rectal	T3	N1	M0	M	2.274	6	0	4
155164	male	55	741.75	13	26	1301	4	yes	rectal	T3	N1	M1	M	3.026	9	0	4
155697	male	39	3.26	24	22	23	2	yes	colon	T3	N1	M1	M	10.964	50	0	3
156528	male	83	293.68	19	25	13	2	no	colon	T4	N1	M1	M	3.553	22	0	3
156530	female	40	1660	151.3	25	1289	4	no	colon	T3	N1	M1	M	9.807	4	0	3
156999	female	49	1494.11	26	11	899	3	no	rectal	T4	N1	M1	M	1.834	7	0	2
157115	male	47	79.01	62.7	20	23	5	no	rectal	T4	N1	M1	M	3.876	8	0	2
157248	female	38	8.82	47.3	18	1301	2	no	colon	T3	N1	M1	M	4.26	18	0	2
157410	male	68	316.54	138.3	21	11	1	no	colon	T3	N1	M0	M	2.556	44	0	2
157419	male	55	3.75	19	31	19	3	no	colon	T3	N1	M0	M	2.241	16	0	2
157513	male	56	29.43	27	29	26	4	no	rectal	T3	N1	M1	M	3.945	8	0	2
157519	male	63	32.34	15	18	29	2	no	rectal	T3	N1	M1	M	2.562	2	0	2
157594	male	49	1185.7	104.6	18	17	3	no	colon	T4	N1	M1	M	3.683	34	0	1
157610	male	28	1.07	35	27	17	4	no	colon	T3	N1	M1	M	5.173	9	0	2
157797	female	50	1658	1230	52.6	585.1	2	no	colon	T3	N1	M1	M	9.143	17	0	1
157888	female	64	3.73	11	25	28	3	no	colon	T1	N0	M0	M	6.09	14	0	1
157893	male	64	5.61	19	20	37	2	no	colon	T4	N1	M0	L	2.635	2	0	2
157960	female	67	126.41	40.1	25	27	4	no	colon	T3	N1	M1	L	8.548	14	0	1
157965	male	72	2.13	13	11	22	2	no	rectal	T3	N0	M0	M	5.173	8	0	1
158042	female	31	7.76	58.5	18	54.7	3	no	rectal	T3	N1	M0	M	2.105	7	0	2
158100	male	64	593.74	14	27	1284	2	no	colon	T3	N1	M0	L	13.976	3	0	2
158111	male	54	6.64	27	13	22	3	no	colon	T1	N0	M0	M	5.484	11	0	2
158130	male	59	3.54	35	16	12	3	no	rectal	T2	N1	M0	M	2.621	4	0	0
